# Supplementary material for: Differences in Coping Strategies and Help-Seeking Behaviours among Australian Junior and Senior Doctors during the COVID-19 Pandemic
Source: MDPI journal article supplement (doi:10.3390/ijerph182413275), 2021-12-16
Supplement: s1 [file s1]

Table S1: Personal and professional predictors of coping and help-seeking for junior doctors

| Junior - multivariate                    | Maintained Exercise |       | Increased Exercise |       | Yoga or Meditation |        | Maintain Social Activity |        | Used App         |       | Increased Alcohol |       | Doctor or Psychologist |        |
|------------------------------------------|---------------------|-------|--------------------|-------|--------------------|--------|--------------------------|--------|------------------|-------|-------------------|-------|------------------------|--------|
|                                          | OR (95% CI)         | p     | OR (95% CI)        | p     | OR (95% CI)        | p      | OR (95% CI)              | p      | OR (95% CI)      | p     | OR (95% CI)       | p     | OR (95% CI)            | p      |
| Age (ordinal)                            | -                   | NA    | 0.71 (0.53-0.94)   | 0.016 | -                  | NA     | -                        | NA     | 0.56 (0.39-0.78) | 0.001 | -                 | NA    | -                      | NA     |
| Female                                   |                     |       |                    |       | 2.46 (1.64-3.71)   | <0.001 | 1.47 (1.00-2.17)         | 0.050  | 1.74 (1.04-2.90) | 0.034 |                   |       | 1.89 (1.09-3.89)       | 0.023  |
| Children                                 | 0.56 (0.30-0.82)    | 0.003 | -                  | NA    | 0.47 (0.30-0.72)   | 0.001  | 0.61 (0.40-0.94)         | 0.025  | -                | NA    |                   |       |                        |        |
| Lives Alone                              |                     |       |                    |       |                    |        |                          |        |                  |       |                   |       | -                      | NA     |
| State (Victoria)                         | -                   | NA    |                    |       |                    |        |                          |        |                  |       |                   |       |                        |        |
| Worse relationship with:                 |                     |       |                    |       |                    |        |                          |        |                  |       |                   |       |                        |        |
| Partner                                  |                     |       |                    |       |                    |        | 0.57 (0.33-0.96)         | 0.036  | 2.19 (1.34-3.58) | 0.002 | -                 | NA    | -                      | NA     |
| Family                                   |                     |       |                    |       | -                  | NA     | -                        | NA     |                  |       | 1.69 (1.17-2.44)  | 0.005 | -                      | NA     |
| Friends                                  |                     |       |                    |       |                    |        | 0.44 (0.31-0.63)         | <0.001 |                  |       | -                 | NA    |                        |        |
| Colleagues                               | -                   | NA    |                    |       | -                  | NA     | -                        | NA     |                  |       | 1.53 (1.01-2.32)  | 0.047 |                        |        |
| Better relationship with:                |                     |       |                    |       |                    |        |                          |        |                  |       |                   |       |                        |        |
| Partner                                  |                     |       | -                  | NA    |                    |        |                          |        |                  |       |                   |       |                        |        |
| Family                                   | -                   | NA    | 1.91 (1.27-2.88)   | 0.002 | 1.82 (1.22-2.73)   | 0.004  | 1.72 (1.13-2.63)         | 0.012  |                  |       |                   |       |                        |        |
| Friends                                  |                     |       | 1.87 (1.12-3.12)   | 0.016 | -                  | NA     | 3.57 (2.06-6.19)         | <0.001 | -                | NA    |                   |       |                        |        |
| Colleagues                               |                     |       |                    |       |                    |        | -                        | NA     |                  |       |                   |       |                        |        |
| Prior Mental Health Diagnosis            |                     |       |                    |       |                    |        |                          |        | 1.71 (1.13-2.58) | 0.011 |                   |       | 7.73 (5.09-11.75)      | <0.001 |
| Concerns about household income          |                     |       |                    |       |                    |        | -                        | NA     |                  |       | 1.58 (1.06-2.36)  | 0.024 |                        |        |
| Currently working with COVID-19 patients |                     |       |                    |       | -                  | NA     |                          |        | 0.65 (0.43-0.96) | 0.032 | -                 | NA    |                        |        |
| Frontline area                           | -                   | NA    | -                  | NA    | -                  | NA     | -                        | NA     | -                | NA    | -                 | NA    | -                      | NA     |
| Family or friend infected with COVID-19  | -                   | NA    |                    |       |                    |        |                          |        |                  |       | -                 | NA    |                        |        |

Reference categories: age (ordinal), female vs male, children vs none, lives alone vs with others, Victoria vs all other states, worse relationships vs neutral, better relationships vs neutral, prior mental health diagnosis vs none, concerns about income vs negative response, currently working with COVID-19 patients vs negative response, frontline area vs medical, family or friend infected with COVID-19 vs negative response. NA = not significant in the multivariate analysis.

**Table S2: Personal and professional predictors of coping and help-seeking for senior doctors**

| Senior-multivariate             | Maintained Exercise |        | Increased Exercise |    | Yoga or Meditation |        | Maintain Social Activity |        | Used App         |        | Increased Alcohol |       | Doctor or Psychologist |        |
|---------------------------------|---------------------|--------|--------------------|----|--------------------|--------|--------------------------|--------|------------------|--------|-------------------|-------|------------------------|--------|
|                                 | OR (95% CI)         | p      | OR (95% CI)        | p  | OR (95% CI)        | p      | OR (95% CI)              | p      | OR (95% CI)      | p      | OR (95% CI)       | p     | OR (95% CI)            | p      |
| <b>Age (ordinal)</b>            | 1.36 (1.17-0.75)    | <0.001 | -                  | NA | 0.76 (0.63-0.91)   | 0.004  | -                        | NA     | 0.73 (0.58-0.93) | 0.011  | -                 | NA    | -                      | NA     |
| <b>Female</b>                   |                     |        |                    |    | 3.14 (2.23-4.41)   | <0.001 | 1.89 (1.44-2.50)         | <0.001 | 2.52 (1.63-3.88) | <0.001 |                   |       | 1.64 (1.09-2.47)       | 0.018  |
| <b>State (Victoria)</b>         |                     |        |                    |    |                    |        |                          |        |                  |        | 1.40 (1.02-1.93)  | 0.036 | 0.46 (0.31-0.69)       | <0.001 |
| <b>Regional location</b>        |                     |        |                    |    |                    |        |                          |        |                  |        |                   |       | -                      | NA     |
| <b>Lives Alone</b>              |                     |        |                    |    | -                  | NA     |                          |        |                  |        |                   |       | 3.08 (1.94-4.88)       | <0.001 |
| <b>Children</b>                 | 0.75 (0.60-0.95)    | 0.017  | -                  | NA | 0.56 (0.42-0.75)   | <0.001 | 0.74 (0.57-0.98)         | 0.035  |                  |        |                   |       |                        |        |
| <b>Elderly care</b>             |                     |        |                    |    |                    |        |                          |        |                  |        | 0.55 (0.32-0.92)  | 0.024 |                        |        |
| <b>Worse relationship with:</b> |                     |        |                    |    |                    |        |                          |        |                  |        |                   |       |                        |        |
| <b>Partner</b>                  |                     |        |                    |    |                    |        | -                        | NA     |                  |        | 1.69 (1.17-2.44)  | 0.005 | -                      | NA     |
| <b>Family</b>                   |                     |        |                    |    |                    |        | -                        | NA     | 1.64 (1.03-2.59) | 0.036  | -                 | NA    | -                      | NA     |
| <b>Friends</b>                  | -                   | NA     |                    |    |                    |        | 0.52 (0.37-0.72)         | <0.001 |                  |        | 1.44 (1.07-1.95)  | 0.016 | -                      | NA     |
| <b>Colleagues</b>               |                     |        |                    |    | -                  | NA     |                          |        | -                | NA     | 1.43 (1.00-2.05)  | 0.048 | -                      | NA     |

| Better relationship with:                |                  |        |                  |        |                  |        |                  |        |                  |       |                  |        |    |
|------------------------------------------|------------------|--------|------------------|--------|------------------|--------|------------------|--------|------------------|-------|------------------|--------|----|
| Partner                                  | -                | NA     | 1.91 (1.17-2.28) | <0.001 | -                | NA     | 1.64 (1.14-2.37) | 0.008  |                  |       |                  |        |    |
| Family                                   | -                | NA     | -                | NA     | 1.99 (1.50-2.65) | <0.001 | -                | NA     |                  |       |                  |        |    |
| Friends                                  | 1.61 (1.24-2.08) | <0.001 | 1.85 (1.25-2.75) | 0.002  | 2.60 (1.76-3.82) | <0.001 | -                | NA     |                  |       | -                | NA     |    |
| Colleagues                               |                  |        |                  |        |                  |        |                  |        | 1.75 (1.30-2.34) | <0.01 |                  |        |    |
| Prior Mental Health Diagnosis            |                  |        | 1.63 (1.17-2.28) | 0.004  | -                | NA     | 2.43 (1.67-3.55) | <0.001 | 1.40 (1.03-1.91) | 0.03  | 6.81 (4.66-9.95) | <0.001 |    |
| Concerns about household income          |                  |        |                  |        |                  |        |                  |        |                  |       | 1.69 (1.13-2.54) | 0.011  |    |
| Currently working with COVID-19 patients |                  |        |                  |        | -                | NA     |                  |        | -                | NA    |                  |        |    |
| Frontline area                           | -                | NA     | -                | NA     | -                | NA     | -                | NA     | -                | NA    | -                | NA     | NA |
| Family or friend infected with COVID-19  |                  |        | -                | NA     |                  |        | -                | NA     |                  |       | 1.81 (1.24-2.64) | 0.002  |    |

Reference categories: age (ordinal), female vs male, Victoria vs all other states, regional vs metropolitan, lives alone vs with others, children vs none, elderly care vs none, worse relationships vs neutral, better relationships vs neutral, prior mental health diagnosis vs none, concerns about income vs negative response, currently working with COVID-19 patients vs negative response, frontline area vs medical, family or friend infected with COVID-19 vs negative response. NA = not significant in the multivariate analysis.
